# Supplementary material
Source: PubMed Central journal article supplement (PMC8094849)
Supplement: BPA-20-539-s001.pdf [file BPA-20-539-s001.pdf]

## Material for online supplementary information

### Supplementary tables

**Supplementary Table 1. List of investigated human miRNAs that were detectable with the Applied Biosystems miRNA Early Access Kit.**

| miRNA        | mature miRNA sequence    | miRNA           | mature miRNA sequence   | miRNA          | mature miRNA sequence   |
|--------------|--------------------------|-----------------|-------------------------|----------------|-------------------------|
| hsa-miR-9    | ucuuuguuauucagucguauaga  | hsa-miR-130b    | cagugcaaugauaaaaggccau  | hsa-miR-205    | uccuaucauccaccggagucug  |
| hsa-miR-9*   | uaaagcuaugauaccgaaaagu   | hsa-miR-132     | uaacagucuaacgaccagugucg | hsa-miR-210    | cugugcggugacagcggcug    |
| hsa-miR-10a  | uaccucguagucuccgaaauugug | hsa-miR-133a    | uugguccuccuuaaccagcugcu | hsa-miR-211    | uuccuuugucauccuugcccu   |
| hsa-miR-15a  | uagcagcacaauaugguuugug   | hsa-miR-133b    | uugguccuccuuaaccagcua   | hsa-miR-213    | accaucgaccguuauuguaacc  |
| hsa-miR-15b  | uagcagcacaucagguuuuaca   | hsa-miR-134     | ugugacugguugaccagagagg  | hsa-miR-214    | acagcagccacagacggcag    |
| hsa-miR-16   | uagcagcagcuuaauauggcgcg  | hsa-miR-135a    | uauggccuuuuauuccuauugga | hsa-miR-215    | augaccuuaugauugacagac   |
| hsa-miR-17*  | acugcagugaaggcacuugu     | hsa-miR-135b    | uauggccuuuuauuccuauugug | hsa-miR-216    | uaaucucagcggcaacuugug   |
| hsa-miR-17   | caaagucuuacagucagguuagu  | hsa-miR-137     | uaugcucuuaagaaucgcguag  | hsa-miR-218    | uugugcuugaucuaaccuauu   |
| hsa-miR-19a  | ugugcaaaucuaugcaaacuga   | hsa-miR-138     | agcugguuguguaauc        | hsa-miR-219    | ugaugucuaaacgaaauuc     |
| hsa-miR-20   | uaaagucuuauagucagguu     | hsa-miR-139     | ucuaagucgucguguc        | hsa-miR-220    | ccacaccguauucgacacuuu   |
| hsa-miR-21   | uagcuuauacagcaguguuuga   | hsa-miR-140     | aguguuuuuaccuauugguag   | hsa-miR-221    | agcucauugucugcggguuuc   |
| hsa-miR-23a  | aucacauugccaggauuuucc    | hsa-miR-141     | aacacugucuguuuaagagg    | hsa-miR-222    | agcucauucgucuaucggucuc  |
| hsa-miR-23b  | aucacauugccaggauuaccac   | hsa-miR-142-3p  | uguauguuuuaccuauuuuagga | hsa-miR-223    | ugucaguuuugcaaaauacc    |
| hsa-miR-25   | cauugcagucucggcugcuga    | hsa-miR-142-5p  | cauaaagugaagagcacuac    | hsa-miR-224    | caagucacuauguguuuccguua |
| hsa-miR-26a  | uucaguuuaccgaguuaggcu    | hsa-miR-144     | uacaguuuagugauuacuaug   | hsa-miR-296    | agggccccccuuaucuccgu    |
| hsa-miR-26b  | uucaguuuaccgaguuaggcu    | hsa-miR-145     | guccaguuuuaccgagaaucuuu | hsa-miR-299    | ugguuuaccgucccauacau    |
| hsa-miR-27a  | uucacagugcuaaauuccgcc    | hsa-miR-146     | ugagaacuuuauuccagugguu  | hsa-miR-301    | cagucaguuuuuuuugcaaaagc |
| hsa-miR-27b  | uucacagugcuaaauuccgcc    | hsa-miR-147     | gugugugaaagucucucg      | hsa-miR-302a   | uaagugcuucaguuuuugguga  |
| hsa-miR-28   | aaggagcucacagucuuuagag   | hsa-miR-148a    | ucugugcucuaagaaucuuu    | hsa-miR-302b   | uaagugcuucaguuuuuagag   |
| hsa-miR-29a  | cuagcaccuucgaaauccgguu   | hsa-miR-149     | ucuggcucgucucuaucucc    | hsa-miR-302b*  | acuuuaaacuaggagucuuuu   |
| hsa-miR-29b  | uagcaccuuuuuagaaucagu    | hsa-miR-150     | ucucccaaccuuguaaccagug  | hsa-miR-302c   | uaagugcuucaguuuuuagagg  |
| hsa-miR-29c  | uagcaccuuuuuagaaucagu    | hsa-miR-151     | acuagacuuuagucucuuaggg  | hsa-miR-302c*  | uuuaaacuaggggcuucucug   |
| hsa-miR-30a* | cuuucagucgggaguuuugcagc  | hsa-miR-152     | ucagugcuaucagaaucuuug   | hsa-miR-302d   | uaagugcuucaguuuuuagag   |
| hsa-miR-30b  | uguaaacuucuaacacucagc    | hsa-miR-154     | uaguuuauccguguuuccuucg  | hsa-miR-320    | aaaagcuggguuagagggcgaa  |
| hsa-miR-30c  | uguaaacuucuaacacucagc    | hsa-miR-154*    | aaucuaacagcguuaccuauu   | hsa-miR-323    | gcacuuacagcggucacucuu   |
| hsa-miR-30d  | uguaaacuucuaacacucagc    | hsa-miR-155     | uuauugcuaucaguuuagggg   | hsa-miR-324-5p | gcacuuacagcggucacucuu   |
| hsa-miR-30e  | uguaaacuucuaacacucagc    | hsa-miR-181a    | aaacuaacagcugcggugagu   | hsa-miR-325    | ccuagugagucaguuuaguu    |
| hsa-miR-31   | ggcaagucugcagcauagcug    | hsa-miR-181b    | aaacuaacagcugcggugagu   | hsa-miR-326    | ccuucggccuuucuccag      |
| hsa-miR-34a  | uggcagugucuuuagcuguuu    | hsa-miR-181c    | aaacuaacagcugcggugagu   | hsa-miR-328    | cuggccuucucgcccucgcu    |
| hsa-miR-34b  | aggcagugucuuuagcuguuu    | hsa-miR-182     | uuuggcauuuagcagacacaca  | hsa-miR-330    | gcaaacgacacggccugcagaga |
| hsa-miR-34c  | aggcagugucuuuagcuguuu    | hsa-miR-182*    | ugguucuaagcuaucgcaacua  | hsa-miR-331    | gccccugggccuuaucagaa    |
| hsa-miR-92   | uuuugcucuugccggccuug     | hsa-miR-183     | uauggcagucuuuagcaguc    | hsa-miR-335    | ucaagagcauuaacgaaauuu   |
| hsa-miR-95   | uuuugcucuugccggccuug     | hsa-miR-184     | uggcagcagaaucgaaagggg   | hsa-miR-337    | uccagcucuaauaugauccuuu  |
| hsa-miR-96   | uuuugcucuugccggccuug     | hsa-miR-185     | uggagagaagggcaguc       | hsa-miR-338    | uccagcagucaguuuuuugua   |
| hsa-miR-98   | ugagguaaguuuaguuuuuu     | hsa-miR-186     | caaagaauucuccuuuuggcuu  | hsa-miR-339    | ucccuugcuccaggagucua    |
| hsa-miR-99a  | aaaccgagaccuuuaaccugug   | hsa-miR-187     | ucugucuuugugcagcggc     | hsa-miR-340    | uccgucaguuuuaauagcc     |
| hsa-miR-100  | aaaccgagaccuuuaaccugug   | hsa-miR-189     | gugccuacagucaguuuagcu   | hsa-miR-342    | ucucacagaaaucgaccggc    |
| hsa-miR-103  | agcagcauuuagcagcuauga    | hsa-miR-190     | ugauuuuuuuuuuuuuuuuu    | hsa-miR-367    | aaugcucuuaagcauuguga    |
| hsa-miR-104  | ucaaaucaugucuuuuuagcu    | hsa-miR-191     | caacggauuccaaagcagcu    | hsa-miR-368    | acauagagaaaauccaguuu    |
| hsa-miR-105  | ucaaaucaugucuuuuuagcu    | hsa-miR-193     | aacugccuuaacaaagucccg   | hsa-miR-370    | gcccuggggugaaaccugg     |
| hsa-miR-106a | aaaagucuuuacagucagguagc  | hsa-miR-194     | uguaaacagcaucuuuaggg    | hsa-miR-371    | gugccgcauuuuuagaguu     |
| hsa-miR-107  | agcagcauuuacagcggcuauca  | hsa-miR-195     | uagcagcagaaaauuuggc     | hsa-miR-372    | aaugucugcagacuuuuagcgu  |
| hsa-miR-122a | uggagugugacaauugguuuuu   | hsa-miR-197     | uucaccaucuccaccagcga    | hsa-miR-373    | gaagucuuuaguuuuugggugu  |
| hsa-miR-124a | uuaggcagcgggugauugcca    | hsa-miR-198     | gguccagaggggaguuagg     | hsa-miR-373*   | acuaaaauggggggcguuucc   |
| hsa-miR-124b | uuaggcagcgggugauugcca    | hsa-miR-199a-5p | cccaguuuacagacuuuagcuu  | hsa-miR-374    | uuuaaucaacuuuaguuuag    |
| hsa-miR-125a | ucccuagaccuuuaaccugug    | hsa-miR-199a-3p | uacaguuuucagcacaauuguu  | hsa-let-7a     | ugaguuuuuuuuuuuuuuuu    |
| hsa-miR-125b | ucccuagaccuuuaaccugug    | hsa-miR-199b    | cccaguuuuaacuuuagcuu    | hsa-let-7b     | ugaguuuuuuuuuuuuuuuu    |
| hsa-miR-126  | ucgucagcaguuuuuuuuuuuu   | hsa-miR-199-s   | cccaguuuuaacuuuagcuu    | hsa-let-7d     | agaaguuuuuuuuuuuuuuuu   |
| hsa-miR-127  | ucgucagcaguuuuuuuuuuuu   | hsa-miR-200a    | uaacacugucuuuuuuuuuu    | hsa-let-7e     | ugaaguuuuuuuuuuuuuuuu   |
| hsa-miR-128a | ucacaguuuuuuuuuuuuuuuu   | hsa-miR-200b    | ucuuuuuuuuuuuuuuuuuuuu  | hsa-let-7g     | ugaguuuuuuuuuuuuuuuu    |
| hsa-miR-128b | ucacaguuuuuuuuuuuuuuuu   | hsa-miR-200c    | aaucagcgggguuuuuuuuuuu  | hsa-let-7i     | ugaguuuuuuuuuuuuuuuu    |
| hsa-miR-129  | uuuuuuuuuuuuuuuuuuuuuu   | hsa-miR-203     | gugaaauuuuuuuuuuuuuuu   |                |                         |
| hsa-miR-130a | cagugcauuuuuuuuuuuuuuuu  | hsa-miR-204     | uuccuuuuuuuuuuuuuuuuuu  |                |                         |

**Supplementary Table 2. Primer sequences used for duplex-PCR analysis of miRNA loci and expression analyses of putative miRNA targets.**

|         | Primer sequences            |                             | Amplicon size |
|---------|-----------------------------|-----------------------------|---------------|
|         | forward                     | reverse                     |               |
| miR-17  | 5'-tcaaagtgcttacagtcaggt-3' | 5'-aaaagcactcaacatcagcag-3' | 134           |
| miR-184 | 5'-tctgcaaagcttcataaa-3'    | 5'-cggaggctgtgagtgcaat-3'   | 132           |
| APRT    | 5'-cctggtgaagatcacggaat-3'  | 5'-gcagtgttgctccag-3'       | 185           |
| WI-3306 | 5'-gtaatgcaggtttggccatt-3'  | 5'-tgctctgttctcaggcagac-3'  | 213           |
| AKRIC3  | 5'-gatcctcaacaagccaggac-3'  | 5'-tctcgttgagatcccagagc-3'  | 147           |
| AKT2    | 5'-aacacaaggaaaggaacca-3'   | 5'-acctagctcggacagctc-3'    | 146           |
| CDC25A  | 5'-ctctggacagctcctctctg-3'  | 5'-gctggagctacacaggaag-3'   | 87            |
| CENTG1  | 5'-gcagctgagttcccttcg-3'    | 5'-tagctgcagcgtttcatgtc-3'  | 110           |
| CTBP1   | 5'-catcatcgtccgattgg-3'     | 5'-ccggtacaggttcaggatgt-3'  | 145           |
| MAZ     | 5'-actgtggcaagagcttctcc-3'  | 5'-cctcgtgtctactgtgtgc-3'   | 147           |
| NRN1    | 5'-acgaacatcaagaccgtgtg-3'  | 5'-tcgaataagctgccttggat-3'  | 149           |
| S100A16 | 5'-ctggagaggagcagactga-3'   | 5'-ccttctccagctccgttag-3'   | 85            |
| SH3GL1  | 5'-ggaccaagctggatgatgac-3'  | 5'-tggacaccgtgttgagcat-3'   | 150           |

**Supplementary Table 3. Potential target genes of miR-184 identified by expression profiling using Affymetrix Human Genome U133 plus 2.0 arrays.** The mRNA expression profiles of glioma cells with miR-184 over-expression (pre-184) and glioma cells transfected with negative controls (pre-NC) were compared. The list contains targets of miR-184 as predicted by the mirBase target database with signal log ratios (pre-184/pre-NC) < -1 and change p-values < 0.05 in both investigated glioma cell lines (A172 and T98G).

| Gene Symbol | Affy-No.     | signal log ratio (pre-184/pre-NC) |      |
|-------------|--------------|-----------------------------------|------|
|             |              | A172                              | T98G |
| CDC25A      | 1555772_a_at | -1.5                              | -1.2 |
| CDC25A      | 204695_at    | -1.6                              | -1.1 |
| CENTG1      | 1555907_at   | -1.0                              | -1.3 |
| LITAF       | 200704_at    | -1.9                              | -1.3 |
| ARHGDI1     | 201167_x_at  | -2.1                              | -1.6 |
| ARHGDI1     | 211716_x_at  | -2.7                              | -1.3 |
| ARHGDI1     | 213606_s_at  | -2.8                              | -1.8 |
| SH3GL1      | 201851_at    | -2.5                              | -1.3 |
| CTBP1       | 203392_s_at  | -2.1                              | -1.5 |
| CTBP1       | 212863_x_at  | -1.9                              | -1.3 |
| CTBP1       | 213980_s_at  | -2.2                              | -1.5 |
| DAG1        | 205417_s_at  | -1.8                              | -1.0 |
| AKR1C3      | 209160_at    | -2.6                              | -2.1 |
| PPAP2B      | 209355_s_at  | -1.4                              | -2.2 |
| PPAP2B      | 212226_s_at  | -1.5                              | -1.5 |
| MAZ         | 212064_x_at  | -1.1                              | -1.0 |
| NRN1        | 218625_at    | -1.7                              | -2.1 |
| KLC2        | 218906_x_at  | -2.2                              | -1.3 |
| LRRC8A      | 224624_at    | -1.7                              | -1.6 |
| LRRC8A      | 233487_s_at  | -2.2                              | -1.1 |
| NSMCE1      | 224666_at    | -2.3                              | -1.7 |
| AKT2        | 225471_s_at  | -1.7                              | -1.1 |
| TMEM142A    | 226531_at    | -2.3                              | -1.8 |
| S100A16     | 227998_at    | -2.6                              | -1.4 |

**Supplementary Table 4. Differential protein expression caused by miR-184 overexpression.** A172 and T98G cells were transfected with miR-184 precursors (pre-184) or negative controls (pre-NC). 2D-DIGE analyses were performed to identify differentially expressed proteins. Note that Npm1 is a predicted target of miR-184.

| Spot-No.                                                                           | Accession-No. | Protein                                                                        | Gene Symbol    | Av. Ratio | p-Value | Seq. pI | Seq. MW | Seq. Coverage | Mascot Score |
|------------------------------------------------------------------------------------|---------------|--------------------------------------------------------------------------------|----------------|-----------|---------|---------|---------|---------------|--------------|
| <b>Up-regulated in A172 cells transfected with pre-184 as compared to pre-NC</b>   |               |                                                                                |                |           |         |         |         |               |              |
| 1                                                                                  | IPI00514561.1 | Heterogeneous nuclear ribonucleoprotein K                                      | HNRPK          | 1.4       | 0.028   | 5.3     | 47.5    | 60.3          | 253.0        |
| 2                                                                                  | IPI00216746.1 | Heterogeneous nuclear ribonucleoprotein K                                      | HNRPK          | 1.4       | 0.033   | 5.0     | 51.0    | 44.2          | 177.0        |
| 3                                                                                  | IPI00024175.3 | Proteasome subunit alpha type-7                                                | PSMA7          | 1.3       | 0.049   | 9.3     | 27.9    | 70.6          | 202.0        |
| 4                                                                                  | IPI00472102.3 | 61 kDa protein                                                                 | HSPD1          | 1.3       | 0.043   | 5.6     | 61.2    | 40.9          | 87.0         |
| 5                                                                                  | IPI00383296.5 | Heterogeneous nuclear ribonucleoprotein M                                      | HNRPM          | 1.3       | 0.034   | 9.6     | 73.6    | 51.1          | 86.2         |
| 6                                                                                  | IPI00514561.1 | Heterogeneous nuclear ribonucleoprotein K                                      | HNRPK          | 1.3       | 0.011   | 5.3     | 47.5    | 44.4          | 148.0        |
| 7                                                                                  | IPI00219018.7 | Glyceraldehyde-3-phosphate dehydrogenase                                       | GAPDH          | 1.2       | 0.048   | 9.3     | 36.0    | 60.0          | 189.0        |
| 8                                                                                  | IPI00383296.5 | Heterogeneous nuclear ribonucleoprotein M                                      | HNRPM          | 1.2       | 0.023   | 9.6     | 73.6    | 57.5          | 284.0        |
| 9                                                                                  | IPI00013881.6 | Heterogeneous nuclear ribonucleoprotein H                                      | HNRPH1         | 1.2       | 0.049   | 5.9     | 49.2    | 63.9          | 230.0        |
| 10                                                                                 | IPI00220271.3 | Alcohol dehydrogenase                                                          | AKR1A1         | 1.2       | 0.012   | 6.4     | 36.5    | 26.8          | 71.6         |
| 11                                                                                 | IPI00847536.1 | heat shock 70kDa protein 1B                                                    | HSPA1B; HSPA1A | 1.2       | 0.050   | 5.4     | 70.0    | 56.2          | 268.0        |
| 12                                                                                 | IPI00013894.1 | Stress-induced-phosphoprotein 1                                                | STIP1          | 1.2       | 0.015   | 6.4     | 62.6    | 47.1          | 216.0        |
| <b>Down-regulated in A172 cells transfected with pre-184 as compared to pre-NC</b> |               |                                                                                |                |           |         |         |         |               |              |
| 13                                                                                 | IPI00418169.3 | annexin A2                                                                     | ANXA2          | -6.6      | 0.044   | 9.2     | 40.4    | 45.1          | 114.0        |
| 14                                                                                 | IPI00295081.1 | Tubulin gamma-1 chain                                                          | TUBG1          | -2.3      | 0.002   | 5.7     | 51.1    | 22.8          | 121.0        |
| 15                                                                                 | IPI00018206.3 | Aspartate amino-transferase, mitochondrial precursor                           | GOT2           | -1.8      | 0.005   | 9.8     | 47.4    | 49.5          | 127.0        |
| 16                                                                                 | IPI00021828.1 | Cystatin-B                                                                     | CSTB           | -1.6      | 0.049   | 7.9     | 11.1    | 61.2          | 91.3         |
| 17                                                                                 | IPI00293167.4 | Stromal cell-derived factor 2 precursor                                        | SDF2           | -1.6      | 0.033   | 7.0     | 23.0    | 50.7          | 103.0        |
| 18                                                                                 | IPI00024540.3 | Endophilin-B2                                                                  | SH3GLB2        | -1.4      | 0.043   | 5.6     | 43.9    | 26.1          | 72.4         |
| 19                                                                                 | IPI00025796.3 | NADH dehydrogenase [ubiquinone] iron-sulfur protein 3, mitochondrial precursor | NDUFS3         | -1.4      | 0.045   | 7.8     | 30.2    | 56.8          | 196.0        |
| 20                                                                                 | IPI00027341.1 | Macrophage-capping protein                                                     | CAPG           | -1.4      | 0.032   | 5.9     | 38.5    | 30.7          | 85.2         |
| 21                                                                                 | IPI00793199.1 | annexin IV                                                                     | ANXA4          | -1.4      | 0.044   | 5.8     | 36.1    | 63.2          | 152.0        |
| 22                                                                                 | IPI00008530.1 | 60S acidic ribosomal protein P0                                                | RPLP0          | -1.3      | 0.025   | 5.6     | 34.3    | 46.4          | 103.0        |
| 23                                                                                 | IPI00012011.6 | Cofilin-1                                                                      | CFL1           | -1.3      | 0.039   | 9.1     | 18.5    | 77.7          | 149.0        |
| 24                                                                                 | IPI00012011.6 | Cofilin-1                                                                      | CFL1           | -1.2      | 0.047   | 9.1     | 18.5    | 45.8          | 65.9         |

| Up-regulated in T98G cells transfected with pre-184 as compared to pre-NC |               |                                                     |                 |     |       |     |      |      |       |
|---------------------------------------------------------------------------|---------------|-----------------------------------------------------|-----------------|-----|-------|-----|------|------|-------|
| 1                                                                         | IPI00216308.5 | Voltage-dependent anion-selective channel protein 1 | VDAC1           | 2.8 | 0.012 | 9.2 | 30.8 | 61.1 | 190.0 |
| 2                                                                         | IPI00021439.1 | Actin, cytoplasmic 1                                | ACTB            | 2.2 | 0.045 | 5.2 | 41.7 | 33.1 | 94.7  |
| 3                                                                         | IPI00021439.1 | Actin, cytoplasmic 1                                | ACTB            | 2.2 | 0.044 | 5.2 | 41.7 | 34.1 | 95.4  |
| 4                                                                         | IPI00025491.1 | Eukaryotic initiation factor 4A-I                   | EIF4A1          | 2.1 | 0.040 | 5.2 | 46.1 | 35.2 | 80.6  |
| 5                                                                         | IPI00026260.1 | Nucleoside diphosphate kinase B                     | NME1;<br>NME2   | 2.0 | 0.045 | 9.4 | 17.3 | 59.9 | 90.5  |
| 6                                                                         | IPI00607693.2 | Carboxylesterase 1 isoform c precursor              | CES1            | 1.9 | 0.009 | 6.2 | 62.4 | 18.0 | 69.2  |
| 7                                                                         | IPI00465439.5 | Fructose-bisphosphate aldolase A                    | ALDOA           | 1.8 | 0.016 | 9.2 | 39.4 | 32.7 | 82.2  |
| 8                                                                         | IPI00021439.1 | Actin, cytoplasmic 1                                | ACTB<br>Actin,  | 1.8 | 0.010 | 5.2 | 41.7 | 78.4 | 209.0 |
| 9                                                                         | IPI00843748.1 | 89 kDa protein                                      | VCP             | 1.8 | 0.036 | 5.0 | 89.3 | 30.5 | 142.0 |
| 10                                                                        | IPI00026260.1 | Nucleoside diphosphate kinase B                     | NME1;<br>NME2   | 1.8 | 0.010 | 9.4 | 17.3 | 59.9 | 90.5  |
| 11                                                                        | IPI00022082.7 | Septin-8                                            | SEPT8           | 1.7 | 0.020 | 5.7 | 49.8 | 46.2 | 150.0 |
| 12                                                                        | IPI00021439.1 | Actin, cytoplasmic 1                                | ACTB            | 1.7 | 0.019 | 5.2 | 41.7 | 32.3 | 74.4  |
| 13                                                                        | IPI00021439.1 | Actin, cytoplasmic 1                                | ACTB            | 1.7 | 0.016 | 5.2 | 41.7 | 40.5 | 150.0 |
| 14                                                                        | IPI00021440.1 | Actin, cytoplasmic 2                                | PSPHL;<br>ACTG1 | 1.7 | 0.035 | 5.2 | 41.8 | 25.9 | 77.8  |
| 15                                                                        | IPI00021440.1 | Actin, cytoplasmic 2                                | PSPHL;<br>ACTG1 | 1.7 | 0.031 | 5.2 | 41.8 | 62.7 | 164.0 |
| 16                                                                        | IPI00003881.5 | Heterogeneous nuclear ribonucleoprotein F           | HNRPF           | 1.7 | 0.012 | 5.3 | 45.6 | 48.9 | 144.0 |
| 17                                                                        | IPI00003362.2 | HSPA5 protein                                       | HSPA5           | 1.6 | 0.048 | 4.9 | 72.4 | 52.5 | 351.0 |
| 18                                                                        | IPI00017855.1 | Aconitate hydratase, mitochondrial precursor        | ACO2            | 1.6 | 0.019 | 7.9 | 85.4 | 51.3 | 292.0 |
| 19                                                                        | IPI00171903.2 | Heterogeneous nuclear ribonucleoprotein M           | HNRPM           | 1.6 | 0.039 | 9.6 | 77.5 | 19.6 | 68.8  |
| 20                                                                        | IPI00011229.1 | Cathepsin D precursor                               | CTSD            | 1.5 | 0.024 | 6.1 | 44.5 | 31.3 | 125.0 |
| 21                                                                        | IPI00387144.4 | Tubulin alpha-1B chain                              | TUBA1B          | 1.5 | 0.015 | 4.8 | 50.1 | 49.9 | 127.0 |
| 22                                                                        | IPI00744692.1 | Transaldolase                                       | TALDO1          | 1.5 | 0.008 | 6.4 | 37.5 | 44.8 | 165.0 |
| 23                                                                        | IPI00291419.5 | Acetyl-CoA acetyltransferase, cytosolic             | ACAT2           | 1.5 | 0.020 | 6.5 | 41.3 | 42.6 | 140.0 |
| 24                                                                        | IPI00465439.5 | Fructose-bisphosphate aldolase A                    | ALDOA           | 1.5 | 0.048 | 9.2 | 39.4 | 72.5 | 234.0 |
| 25                                                                        | IPI00396378.3 | Heterogeneous nuclear ribonucleoproteins A2/B1      | HNRNP<br>A2B1   | 1.4 | 0.026 | 9.3 | 37.4 | 34.6 | 88.4  |
| 26                                                                        | IPI00002966.1 | Heat shock 70 kDa protein 4                         | HSPA4           | 1.4 | 0.008 | 5.0 | 94.2 | 23.6 | 101.0 |
| 27                                                                        | IPI00021439.1 | Actin, cytoplasmic 1                                | ACTB            | 1.4 | 0.019 | 5.2 | 41.7 | 44.5 | 125.0 |
| 28                                                                        | IPI00216746.1 | Heterogeneous nuclear ribonucleoprotein K           | HNRPK           | 1.4 | 0.018 | 5.0 | 51.0 | 40.5 | 150.0 |
| 29                                                                        | IPI00021439.1 | Actin, cytoplasmic 1                                | ACTB            | 1.4 | 0.030 | 5.2 | 41.7 | 58.4 | 170.0 |
| 30                                                                        | IPI00418471.6 | Vimentin                                            | VIM             | 1.3 | 0.049 | 4.9 | 53.6 | 53.0 | 153.0 |
| 31                                                                        | IPI00455315.4 | Annexin A2                                          | ANXA2           | 1.3 | 0.010 | 8.5 | 38.6 | 63.7 | 171.0 |
| 32                                                                        | IPI00334190.4 | Stomatin-like protein 2                             | STOML2          | 1.3 | 0.007 | 7.7 | 38.5 | 45.2 | 94.2  |
| 33                                                                        | IPI00783586.1 | 43 kDa protein                                      | NDRG1           | 1.3 | 0.018 | 5.4 | 42.8 | 29.2 | 66.0  |
| 34                                                                        | IPI00297477.3 | U2 small nuclear ribonucleoprotein A'               | SNRPA1          | 1.3 | 0.030 | 9.4 | 28.4 | 29.4 | 120.0 |

|                                                                                    |               |                                                                           |                 |      |       |     |      |      |       |
|------------------------------------------------------------------------------------|---------------|---------------------------------------------------------------------------|-----------------|------|-------|-----|------|------|-------|
| 35                                                                                 | IPI00305383.1 | Cytochrome b-c1 complex subunit 2, mitochondrial precursor                | UQCRC2          | 1.3  | 0.039 | 9.3 | 48.4 | 39.7 | 132.0 |
| 36                                                                                 | IPI00179964.5 | Polypyrimidine tract-binding protein 1                                    | PTBP1           | 1.2  | 0.001 | 9.8 | 57.2 | 25.2 | 73.3  |
| 37                                                                                 | IPI00002966.1 | Heat shock 70 kDa protein 4                                               | HSPA4           | 1.1  | 0.005 | 5.0 | 94.2 | 57.0 | 303.0 |
| <b>Down-regulated in T98G cells transfected with pre-184 as compared to pre-NC</b> |               |                                                                           |                 |      |       |     |      |      |       |
| 38                                                                                 | IPI00549248.4 | Nucleophosmin                                                             | NPM1            | -1.6 | 0.026 | 4.5 | 32.6 | 34.4 | 95.1  |
| 39                                                                                 | IPI00017855.1 | Aconitate hydratase, mitochondrial precursor                              | ACO2            | -1.6 | 0.050 | 7.9 | 85.4 | 46.0 | 225.0 |
| 40                                                                                 | IPI00015833.1 | Coiled-coil-helix-coiled-coil-helix domain-containing protein 3           | CHCHD3          | -1.5 | 0.043 | 9.3 | 26.1 | 52.4 | 197.0 |
| 41                                                                                 | IPI00017855.1 | Aconitate hydratase, mitochondrial precursor                              | ACO2            | -1.5 | 0.023 | 7.9 | 85.4 | 48.2 | 214.0 |
| 42                                                                                 | IPI00005087.1 | Tropomodulin-3                                                            | TMOD3           | -1.4 | 0.041 | 4.9 | 39.6 | 53.1 | 225.0 |
| 43                                                                                 | IPI00411706.1 | S-formylglutathione hydrolase                                             | ESD             | -1.4 | 0.018 | 6.6 | 31.4 | 60.3 | 114.0 |
| 44                                                                                 | IPI00010779.4 | Tropomyosin alpha-4 chain                                                 | TPM4            | -1.4 | 0.005 | 4.5 | 28.5 | 44.8 | 178.0 |
| 45                                                                                 | IPI00021440.1 | Actin, cytoplasmic 2                                                      | PSPHL;<br>ACTG1 | -1.4 | 0.001 | 5.2 | 41.8 | 35.5 | 115.0 |
| 46                                                                                 | IPI00029744.1 | Single-stranded DNA-binding protein, mitochondrial precursor              | SSBP1           | -1.4 | 0.046 | 9.9 | 17.2 | 41.2 | 88.6  |
| 47                                                                                 | IPI00021439.1 | Actin, cytoplasmic 1                                                      | ACTB            | -1,3 | 0,033 | 5,2 | 41,7 | 42,7 | 98,2  |
| 48                                                                                 | IPI00641950.3 | Lung cancer oncogene 7                                                    | GNB2L1          | -1.3 | 0.012 | 9.6 | 37.9 | 70.6 | 198.0 |
| 49                                                                                 | IPI00549885.4 | Pyruvate dehydrogenase E1 component subunit beta, mitochondrial precursor | PDHB            | -1.3 | 0.033 | 5.6 | 37.2 | 26.7 | 72.2  |
| 50                                                                                 | IPI00218918.5 | Annexin A1                                                                | ANXA1           | -1.3 | 0.029 | 6.7 | 38.7 | 35.3 | 95.7  |
| 51                                                                                 | IPI00015018.1 | Inorganic pyrophosphatase                                                 | PPA1            | -1.3 | 0.029 | 5.5 | 32.6 | 74.0 | 212.0 |
| 52                                                                                 | IPI00289800.7 | Glucose-6-phosphate 1-dehydrogenase                                       | G6PD            | -1.2 | 0.037 | 6.4 | 59.2 | 48.0 | 92.3  |
| 53                                                                                 | IPI00759575.1 | Glutathione reductase, mitochondrial precursor                            | GSR I           | -1.2 | 0.005 | 8.6 | 51.7 | 58.9 | 193.0 |
| 54                                                                                 | IPI00289800.7 | Glucose-6-phosphate 1-dehydrogenase                                       | G6PD            | -1.2 | 0.007 | 6.4 | 59.2 | 77.5 | 375.0 |

**Supplementary Table 5. Differential protein expression caused by inhibition of miR-17.**

A172 and T98G cells were transfected with miR-17 inhibitors (anti-17) or negative controls (anti-NC). 2D-DIGE analyses were performed to identify differentially expressed proteins.

Note that Pold2 is a predicted target of miR-17.

| Spot-No.                                                                            | Accession          | Protein                                                                     | Gene Symbol       | Av. Ratio | p-Value | Seq. pI | Seq. MW | Seq. Coverage | Mascot Score |
|-------------------------------------------------------------------------------------|--------------------|-----------------------------------------------------------------------------|-------------------|-----------|---------|---------|---------|---------------|--------------|
| <b>Up-regulated in A172 cells transfected with anti-17 as compared to anti-NC</b>   |                    |                                                                             |                   |           |         |         |         |               |              |
| 1                                                                                   | IPI00003362.2      | HSPA5 protein                                                               | HSPA5             | 1.4       | 0.023   | 4.9     | 72.4    | 42.4          | 214.0        |
| 2                                                                                   | IPI00216746.1      | Heterogeneous nuclear ribonucleoprotein K                                   | HNRPK             | 1.3       | 0.026   | 5.0     | 51.0    | 41.8          | 197.0        |
| 3                                                                                   | IPI00845339.1      | heat shock 70kDa protein 1A                                                 | HSPA1B;<br>HSPA1A | 1.3       | 0.025   | 5.4     | 70.0    | 51.0          | 193.0        |
| 4                                                                                   | IPI00003865.1      | Heat shock cognate 71 kDa protein                                           | HSPA8             | 1.2       | 0.022   | 5.2     | 70.9    | 51.7          | 220.0        |
| 5                                                                                   | IPI00219757.1<br>3 | Glutathione S-transferase P                                                 | GSTP1             | 1.2       | 0.013   | 5.3     | 23.3    | 57.6          | 109.0        |
| 6                                                                                   | IPI00021440.1      | Actin, cytoplasmic 2                                                        | PSPHL;<br>ACTG1   | 1.2       | 0.026   | 5.2     | 41.8    | 25.3          | 76.5         |
| 7                                                                                   | IPI00396485.3      | Elongation factor 1-alpha 1                                                 | EEF1A1            | 1.2       | 0.047   | 9.7     | 50.1    | 37.0          | 107.0        |
| 8                                                                                   | IPI00007765.5      | Stress-70 protein, mitochondrial precursor                                  | HSPA9             | 1.2       | 0.050   | 5.8     | 73.6    | 56.4          | 331.0        |
| 9                                                                                   | IPI00843975.1      | Ezrin                                                                       | VIL2              | 1.2       | 0.022   | 5.9     | 69.4    | 57.8          | 224.0        |
| 10                                                                                  | IPI00304925.5      | Heat shock 70 kDa protein 1                                                 | HSPA1B;<br>HSPA1A | 1.2       | 0.001   | 5.4     | 70.0    | 43.2          | 147.0        |
| 11                                                                                  | IPI00479209.1      | KH domain-containing, RNA-binding, signal transduction-associated protein 1 | KHDRBS<br>1       | 1.2       | 0.033   | 7.7     | 45.9    | 34.4          | 121.0        |
| 12                                                                                  | IPI00219219.3      | Galectin-1                                                                  | LGALS1            | 1.2       | 0.007   | 5.2     | 14.7    | 60.0          | 126.0        |
| 13                                                                                  | IPI00465248.5      | Alpha-enolase                                                               | ENO1              | 1.2       | 0.012   | 7.7     | 47.1    | 52.1          | 177.0        |
| 14                                                                                  | IPI00010720.1      | T-complex protein 1 subunit epsilon                                         | CCT5              | 1.1       | 0.010   | 5.3     | 59.6    | 67.5          | 240.0        |
| 15                                                                                  | IPI00000105.4      | Major vault protein                                                         | MVP               | 1.1       | 0.010   | 5.2     | 99.3    | 20.2          | 86.9         |
| 16                                                                                  | IPI00007765.5      | Stress-70 protein, mitochondrial precursor                                  | HSPA9             | 1.1       | 0.003   | 5.8     | 73.6    | 49.9          | 216.0        |
| 17                                                                                  | IPI00465248.5      | Alpha-enolase                                                               | ENO1              | 1.1       | 0.049   | 7.7     | 47.1    | 55.8          | 189.0        |
| 18                                                                                  | IPI00009771.6      | Lamin-B2                                                                    | LMNB2             | 1.1       | 0.016   | 5.4     | 69.9    | 31.8          | 163.0        |
| 19                                                                                  | IPI00414696.1      | Heterogeneous nuclear ribonucleoproteins A2/B1                              | HNRNP<br>A2B1     | 1.1       | 0.019   | 9.1     | 36.0    | 57.8          | 187.0        |
| 20                                                                                  | IPI00000105.4      | Major vault protein                                                         | MVP               | 1.1       | 0.033   | 5.2     | 99.3    | 35.1          | 183.0        |
| <b>Down-regulated in A172 cells transfected with anti-17 as compared to anti-NC</b> |                    |                                                                             |                   |           |         |         |         |               |              |
| 21                                                                                  | IPI00016832.1      | Proteasome subunit alpha type-1                                             | PSMA1             | -1.6      | 0.042   | 6.2     | 29.5    | 54.4          | 101.0        |
| 22                                                                                  | IPI00396485.3      | Elongation factor 1-alpha 1                                                 | EEF1A1            | -1.3      | 0.049   | 9.7     | 50.1    | 45.2          | 127.0        |
| 23                                                                                  | IPI00479186.5      | Pyruvate kinase isozymes M1/M2                                              | PKM2              | -1.3      | 0.043   | 9.0     | 57.9    | 75.3          | 350.0        |
| <b>Up-regulated in T98G cells transfected with anti-17 as compared to anti-NC</b>   |                    |                                                                             |                   |           |         |         |         |               |              |
| 1                                                                                   | IPI00002922.5      | F-box-like/WD repeat-containing protein TBL1XR1                             | TBL1XR1           | 1.5       | 0.032   | 5.2     | 55.6    | 33.5          | 88.9         |
| 2                                                                                   | IPI00168554.1      | Sulfiredoxin-1                                                              | SRXN1;<br>SCRT2   | 1.4       | 0.016   | 9.1     | 14.3    | 65.0          | 84.0         |

|    |                |                                                             |                |     |       |     |       |      |       |
|----|----------------|-------------------------------------------------------------|----------------|-----|-------|-----|-------|------|-------|
| 3  | IPI00465248.5  | Alpha-enolase                                               | ENO1           | 1.4 | 0.015 | 7.7 | 47.1  | 56.5 | 195.0 |
| 4  | IPI00017855.1  | Aconitate hydratase, mitochondrial precursor                | ACO2           | 1.3 | 0.039 | 7.9 | 85.4  | 36.4 | 172.0 |
| 5  | IPI00657680.1  | Uncharacterized protein PDIA3                               | PDIA3          | 1.3 | 0.001 | 6.4 | 54.9  | 50.5 | 228.0 |
| 6  | IPI00297779.7  | T-complex protein 1 subunit beta                            | CCT2           | 1.3 | 0.029 | 6.0 | 57.5  | 43.0 | 97.1  |
| 7  | IPI00025616.1  | DNA polymerase subunit delta-2                              | POLD2          | 1.3 | 0.033 | 5.2 | 51.3  | 29.2 | 68.9  |
| 8  | IPI00025512.2  | Heat shock protein beta-1                                   | HSPB1          | 1.3 | 0.037 | 6.0 | 22.8  | 33.7 | 72.0  |
| 9  | IPI00182728.2  | Vacuolar protein sorting-associated protein 4B              | VPS4B          | 1.3 | 0.039 | 6.9 | 49.3  | 30.4 | 76.7  |
| 10 | IPI00218342.10 | C-1-tetrahydrofolate synthase, cytoplasmic                  | MTHFD1         | 1.3 | 0.036 | 7.0 | 101.5 | 57.6 | 405.0 |
| 11 | IPI00032826.1  | Hsc70-interacting protein                                   | ST13           | 1.3 | 0.013 | 5.0 | 41.3  | 32.8 | 69.6  |
| 12 | IPI00011126.6  | 26S protease regulatory subunit 4                           | PSMC1          | 1.2 | 0.010 | 5.8 | 49.2  | 39.8 | 140.0 |
| 13 | IPI00025252.1  | Protein disulfide-isomerase A3 precursor                    | PDIA3          | 1.2 | 0.009 | 5.9 | 56.7  | 46.9 | 204.0 |
| 14 | IPI00784104.1  | Sequestosome-1                                              | SQSTM1         | 1.2 | 0.004 | 5.2 | 38.6  | 54.8 | 134.0 |
| 15 | IPI00444704.2  | G-rich sequence factor 1                                    | GRSF1          | 1.2 | 0.038 | 5.4 | 48.0  | 32.5 | 88.7  |
| 16 | IPI00643920.2  | Transketolase                                               | TKT            | 1.2 | 0.016 | 8.5 | 67.8  | 56.7 | 177.0 |
| 17 | IPI00010720.1  | T-complex protein 1 subunit epsilon                         | CCT5           | 1.2 | 0.002 | 5.3 | 59.6  | 46.6 | 90.8  |
| 18 | IPI00783357.1  | Sequestosome-1                                              | SQSTM1         | 1.2 | 0.012 | 5.0 | 47.7  | 48.6 | 148.0 |
| 19 | IPI00289800.7  | Glucose-6-phosphate 1-dehydrogenase                         | G6PD           | 1.2 | 0.010 | 6.4 | 59.2  | 63.7 | 295.0 |
| 20 | IPI00304925.5  | Heat shock 70 kDa protein 1                                 | HSPA1B; HSPA1A | 1.2 | 0.046 | 5.4 | 70.0  | 54.4 | 224.0 |
| 21 | IPI00219018.7  | Glyceraldehyde-3-phosphate dehydrogenase                    | GAPDH          | 1.2 | 0.016 | 9.3 | 36.0  | 57.9 | 123.0 |
| 22 | IPI00303476.1  | ATP synthase subunit beta, mitochondrial precursor          | ATP5B          | 1.2 | 0.028 | 5.1 | 56.5  | 63.9 | 224.0 |
| 23 | IPI00018452.1  | Copine-1                                                    | CPNE1          | 1.2 | 0.044 | 5.4 | 59.0  | 25.1 | 90.6  |
| 24 | IPI00550689.3  | UPF0027 protein C22orf28                                    | C22orf28       | 1.2 | 0.028 | 6.9 | 55.2  | 60.4 | 224.0 |
| 25 | IPI00008475.1  | Hydroxymethylglutaryl-CoA synthase, cytoplasmic             | HMGCS1         | 1.1 | 0.014 | 5.1 | 57.3  | 44.4 | 180.0 |
| 26 | IPI00012795.3  | Eukaryotic translation initiation factor 3 subunit 2        | EIF3I          | 1.1 | 0.006 | 5.3 | 36.5  | 42.2 | 126.0 |
| 27 | IPI00031420.3  | UDP-glucose 6-dehydrogenase                                 | UGDH           | 1.1 | 0.011 | 6.9 | 55.0  | 79.6 | 166.0 |
| 28 | IPI00150961.2  | membrane component chromosome 11 surface marker 1 isoform 1 | CAPRN1         | 1.1 | 0.032 | 5.0 | 78.3  | 22.0 | 81.6  |
| 29 | IPI00021405.3  | Lamin-A/C                                                   | LMNA           | 1.1 | 0.012 | 6.6 | 74.1  | 47.7 | 235.0 |
| 30 | IPI00746165.2  | WD repeat-containing protein 1                              | WDR1           | 1.1 | 0.038 | 6.2 | 66.2  | 59.6 | 271.0 |
| 31 | IPI00395646.1  | Thioredoxin domain containing 5                             | TXNDC5; MUTED  | 1.1 | 0.045 | 5.7 | 43.6  | 42.7 | 118.0 |
| 32 | IPI00465439.5  | Fructose-bisphosphate aldolase A                            | ALDOA          | 1.1 | 0.045 | 9.2 | 39.4  | 34.6 | 101.0 |
| 33 | IPI00029079.5  | GMP synthase                                                | GMPS           | 1.1 | 0.004 | 6.4 | 76.7  | 37.5 | 172.0 |
| 34 | IPI00440493.2  | ATP synthase subunit alpha, mitochondrial precursor         | ATP5A1         | 1.1 | 0.028 | 9.6 | 59.7  | 37.4 | 126.0 |
| 35 | IPI00306369.3  | tRNA                                                        | NSUN2          | 1.1 | 0.031 | 6.3 | 86.4  | 46.9 | 186.0 |



|                                                                                     |               |                                                                       |              |      |       |     |      |      |       |
|-------------------------------------------------------------------------------------|---------------|-----------------------------------------------------------------------|--------------|------|-------|-----|------|------|-------|
| 36                                                                                  | IPI00788802.1 | Transketolase variant (Fragment)                                      | TKT          | 1.1  | 0.003 | 8.8 | 67.9 | 46.1 | 206.0 |
| <b>Down-regulated in T98G cells transfected with anti-17 as compared to anti-NC</b> |               |                                                                       |              |      |       |     |      |      |       |
| 37                                                                                  | IPI00012011.6 | Cofilin-1                                                             | CFL1         | -1.7 | 0.007 | 9.1 | 18.5 | 59.0 | 125.0 |
| 38                                                                                  | IPI00171199.5 | Proteasome subunit alpha type-3                                       | PSMA3        | -1.5 | 0.005 | 5.1 | 27.6 | 33.9 | 99.4  |
| 39                                                                                  | IPI00216691.5 | Profilin-1                                                            | PFN1         | -1.3 | 0.027 | 9.4 | 15.0 | 60.7 | 81.2  |
| 40                                                                                  | IPI00015842.1 | Reticulocalbin-1 precursor                                            | RCN1         | -1.2 | 0.011 | 4.7 | 38.9 | 44.4 | 149.0 |
| 41                                                                                  | IPI00096066.2 | Succinyl-CoA ligase [GDP-forming] beta-chain, mitochondrial precursor | SUCLG2       | -1.2 | 0.006 | 6.1 | 46.5 | 23.6 | 70.8  |
| 42                                                                                  | IPI00021440.1 | Actin, cytoplasmic 2                                                  | PSPHL; ACTG1 | -1.2 | 0.004 | 5.2 | 41.8 | 70.7 | 213.0 |
| 43                                                                                  | IPI00334175.3 | Polypyrimidine tract-binding protein 1                                | PTBP1        | -1.1 | 0.040 | 9.7 | 59.0 | 29.1 | 89.5  |
| 44                                                                                  | IPI00014537.3 | Calumenin precursor                                                   | CALU         | -1.1 | 0.010 | 4.3 | 37.1 | 52.4 | 142.0 |
| 45                                                                                  | IPI00011107.2 | Isocitrate dehydrogenase [NADP], mitochondrial precursor              | IDH2         | -1.1 | 0.015 | 9.6 | 50.9 | 19.5 | 72.4  |
| 46                                                                                  | IPI00290416.3 | Obg-like ATPase 1                                                     | OLA1         | -1.1 | 0.000 | 8.6 | 44.7 | 73.2 | 258.0 |
| 47                                                                                  | IPI00386114.1 | Splicing factor 1                                                     | SF1          | -1.1 | 0.042 | 9.7 | 68.3 | 18.6 | 74.0  |
| 48                                                                                  | IPI00465028.7 | Triosephosphate isomerase                                             | TPI1         | -1.1 | 0.045 | 5.6 | 30.8 | 50.3 | 133.0 |

## Supplementary figures

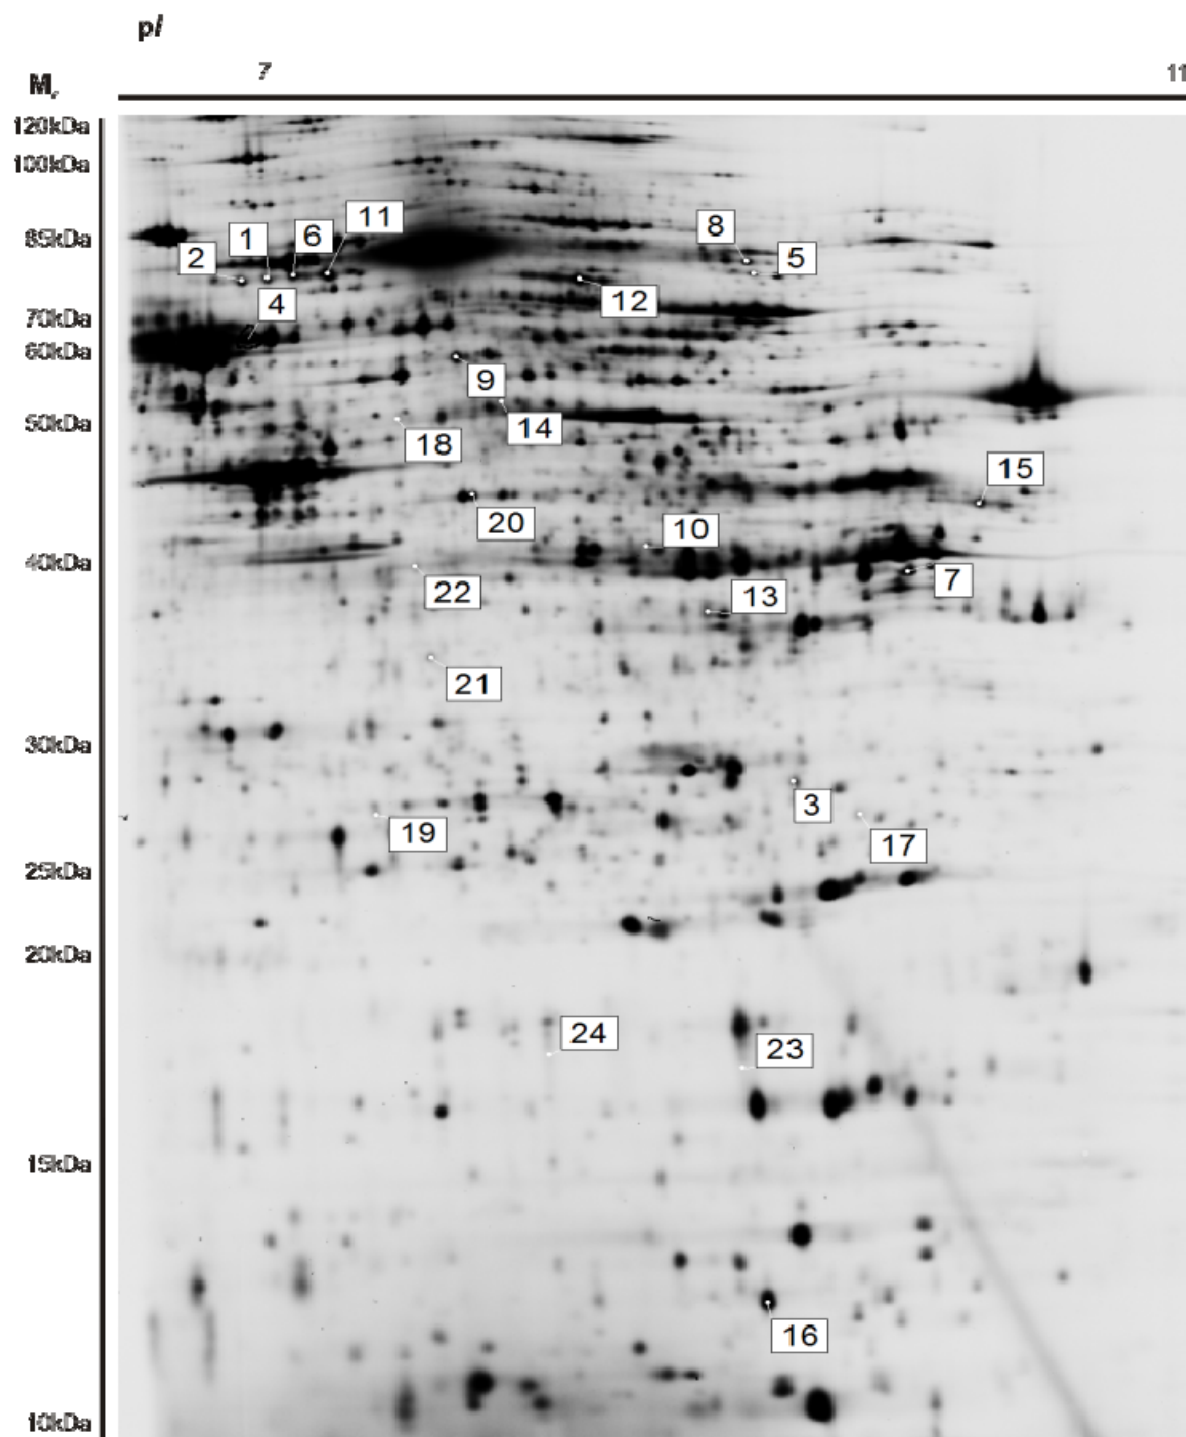

**Supplementary Figure 1. Representative proteome pattern of A172 cells transfected with miR-184 precursors revealed by 2D-DIGE. Image analysis and subsequent MS-analyses led to the identification of 24 significantly regulated proteins.**

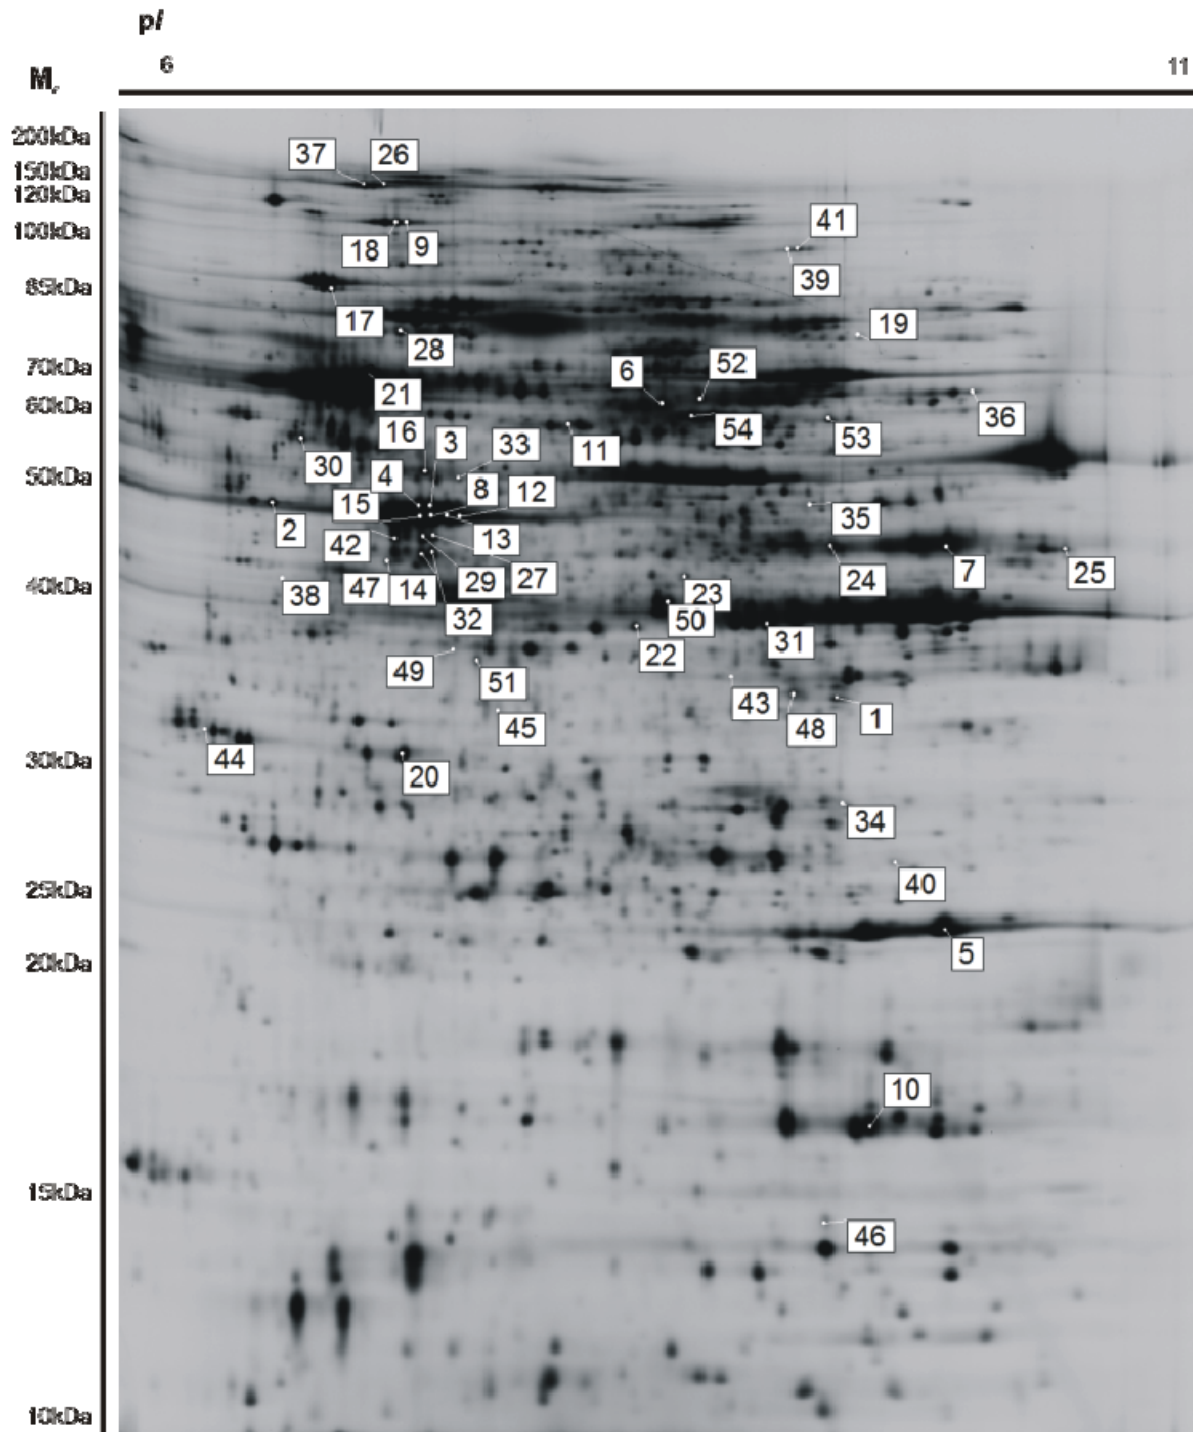

**Supplementary Figure 2. Representative proteome pattern of T98G cells transfected with miR-184 precursors revealed by 2D-DIGE. Image analysis and subsequent MS-analyses led to the identification of 54 significantly regulated proteins.**

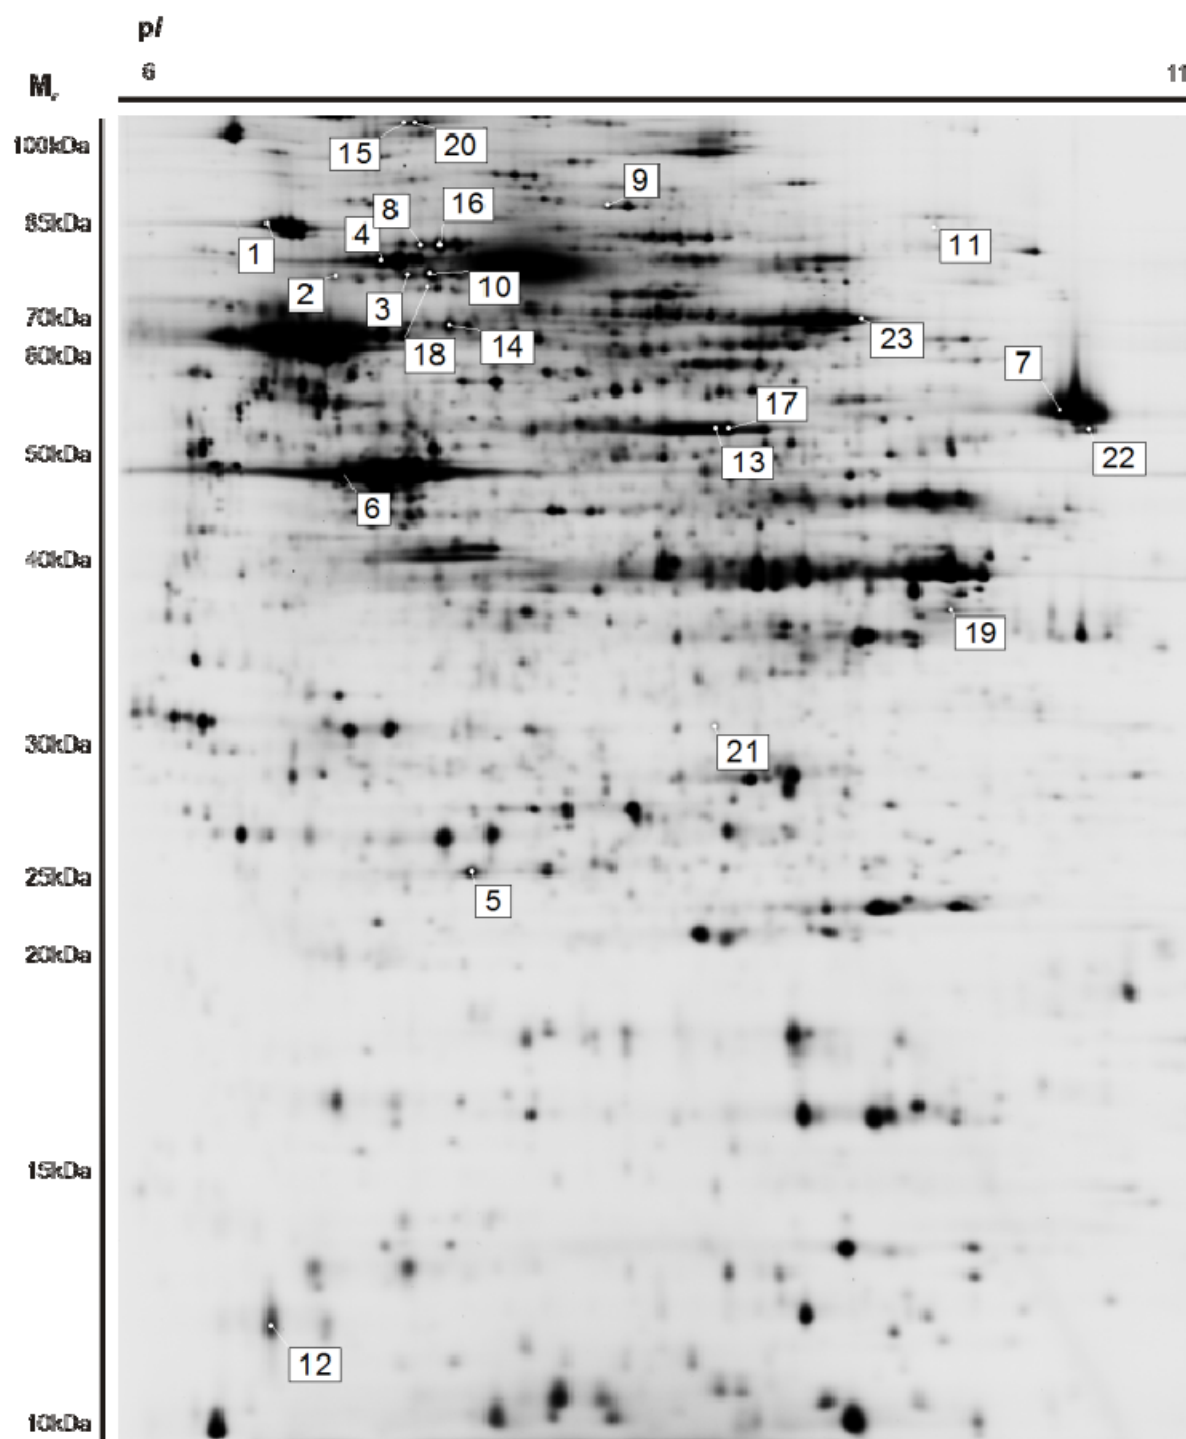

**Supplementary Figure 3. Representative proteome pattern of A172 cells transfected with miR-17 inhibitors revealed by 2D-DIGE. Image analysis and subsequent MS-analyses led to the identification of 23 significantly regulated proteins.**

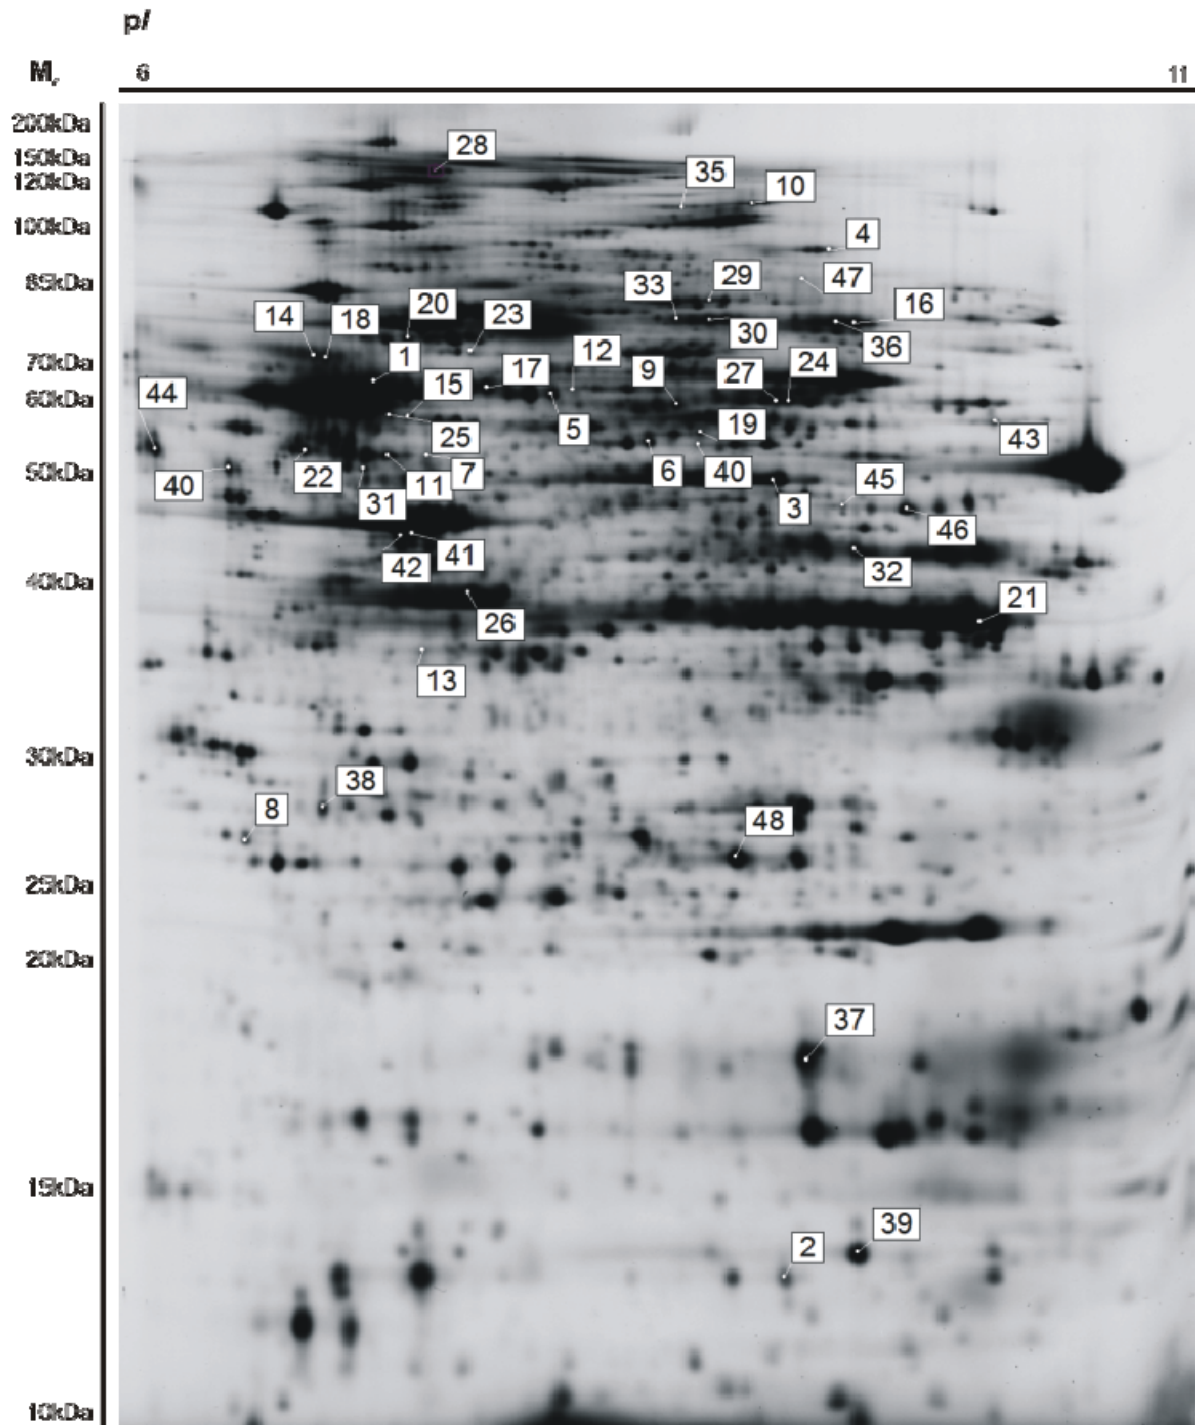

**Supplementary Figure 4. Representative proteome pattern of T98G cells transfected with miR-17 inhibitors revealed by 2D-DIGE. Image analysis and subsequent MS-analyses led to the identification of 48 significantly regulated proteins.**



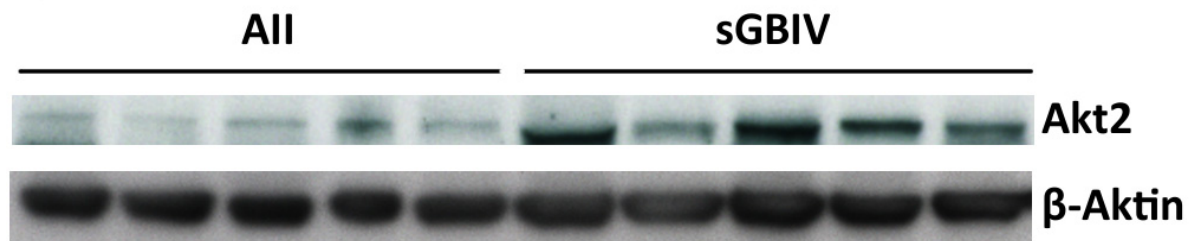

**Supplementary Figure 5. Expression of Akt2 protein in diffuse astrocytomas as compared to secondary glioblastomas.** Western blots containing protein extracts from five diffuse astrocytomas (AII) and five secondary glioblastomas (sGBIV) were probed with antibodies against Akt2 and beta-actin as a loading control. Note increased Akt2 protein levels in secondary glioblastomas as compared to the low-grade diffuse astrocytomas.
